# Supplementary material for: Emergence of NDM-type metallo-β-lactamase and ArmA 16S rRNA methylase co-producing Morganella morganii in Myanmar
Source: Research Square preprint supplement (doi:10.21203/rs.3.rs-7405418/v1), 2025-10-12
Supplement: Supplementary file 1 [file 40c41c8b16c419b00d65d1be.xlsx]

## Sheet: Table2
	Table 2. Strains harboring the genomic region containing both blaNDM-1 and armA with 26,332 bp flanked by IS26a
	species	strain	accession no.	query cover(%)	per.identity (%)	chromosome/plasmidb	host	isolation source	country/region	year
	Morganella morganii (this study)	YHG122	AP041090	100	100	chromosome	human	urine	Myanmar	2023
	Enterobacter homaechei	01A20CPO005	PV022888	100	99.98	plasmid	human	sputum	Canada	2020
	E. homaechei	26G22CPO001	PV022982	100	99.99	plasmid	human	urine	Canada	2022
	E. homaechei	C126	CP041052	100	99.84	plasmid	human	urine	India	2016
	Escherichia coli	n.d. (no data)	CP050162	100	99.98	plasmid	human	rectal swab	Hong Kong	2012
	E. coli	4974960	PQ341119	100	100	plasmid	human	rectal swab	Israel	2024
	E. coli	IT-ECO-01/2014	MH722220	100	99.90	plasmid	human	rectal swab	Italy	2014
	E. coli	MyNCGM74	LC744514	100	99.98	plasmid	human	n.d.	Myanmar	2016
	E. coli	MyNCGM603	LC744502	100	99.98	plasmid	human	n.d.	Myanmar	2017
	E. coli	MyJU780	LC744438	100	99.99	plasmid	human	n.d.	Myanmar	2018
	E. coli	HK-01	HQ451074	100	99.99	plasmid	n.d.	n.d.	Hong Kong	2011
	Klebsiella oxytoca	38M23CPO090	PV023155	100	99.99	plasmid	human	urine	Canada	2023
	Klebsiella pneumoniae	JHKP136	CP180654	100	100	plasmid	human	bile	China	2023
	K. pneumoniae	JHKP140	CP180664	100	100	plasmid	human	sputum	China	2023
	K. pneumoniae	JHKP159	CP180669	100	100	plasmid	human	sputum	China	2023
	K. pneumoniae	JHKP133	CP180649	100	100	plasmid	human	sputum	China	2023
	K. pneumoniae	7433	KJ187752	100	99.99	plasmid	n.d.	n.d.	Taiwan	n.d.
	K. pneumoniae	AR_0143	CP021709	100	99.90	plasmid	n.d.	n.d.	n.d.	n.d.
	K. pneumoniae	IT-Kpn-01/2014	MH722217	100	99.90	plasmid	human	rectal swab	Italy	2015
	K. pneumoniae	MyNCGM088	LC765518	100	99.92	plasmid	human	n.d.	Myanmar	2016
	K. pneumoniae	MyNCGM084	LC536683	100	99.93	plasmid	human	n.d.	Myanmar	2016
	K. pneumoniae	dm228	CP095602	100	99.98	plasmid	human	wound	Bangladesh	2016
	K. pneumoniae	601	JX988621	100	99.99	plasmid	human	urine	Oman	n.d.
	K. pneumoniae	ST101:960186733	CP023488	100	100	plasmid	human	n.d.	South Africa	2016
	K. pneumoniae	NDM-1saitama01	AB759690	100	100	plasmid	human	urine	Japan	2010
	aStrains harboring the 26,332 bp genomic region flanked by IS26 were searched by NIH BLAST (https://blast.ncbi.nlm.nih.gov/Blast.cgi?PROGRAM=blastn&PAGE_TYPE=BlastSearch&LINK_LOC=blasthome) and all the isolates with query cover more than 100% and per. identity more than 99.8, compared with M. morganii YGH122, were listed in this table. bChromosome or plasmid on which the 26,332 bp genomic region …
