# Supplementary material for: Emergence of NDM-type metallo-β-lactamase and ArmA 16S rRNA methylase co-producing Morganella morganii in Myanmar
Source: Research Square preprint supplement (doi:10.21203/rs.3.rs-7405418/v1), 2025-10-12
Supplement: Supplementary file 2 [file 4f7aae9118e2f89f65eca893.xlsx]

## Sheet: Sheet1
	Table S1. All 46 M. morganii strains tested in the phylogenetic analysis
	strain	accession no.	remarks	country	host	sample	year
	2387	CP139441		China	human	blood	2020
	2022CK-00284	CP132323		USA	human	rectal swab	2022
	2022JQ-00674	CP137459		USA	human	urine	2022
	2024CK-01033	CP168464		USA	human	urine	2024
	23	CP132600		China	large yellow croaker (Larimichthys crocea)	n.d. (no data)	2021
	41	CP132746		China	large yellow croaker (Larimichthys crocea)	n.d.	2021
	AR_0057	CP027177		USA	human	n.d.	2015
	AR_0133	CP028956		USA	human	n.d.	2015
	ATCC 25830	CP034944	type strain	unknown	environment	n.d.	2019
	DG56-16	CP032295		China	crocodile lizard (Shinisaurus crocodilurus)	n.d.	2018
	DSM 30164	CP069157		United Kingdom	human	stool	1905
	FDAARGOS_1085	CP068145		Germany	human	n.d.	n.d.
	FDAARGOS_172	CP014026		USA	human	urine	2024
	FDAARGOS_365	CP023505		USA	human	stool	2014
	FDAARGOS_63	CP026046		USA	human	wound	2013
	GDMM86	CP061513		China	environment	environment	2020
	HD0531g	CP132554		China	n.d.	n.d.	2021
	K266	CP103768		China	human	sputum	2017
	MGH29	SAMD00893584		Myanmar (Mandalay)	human	urine	2023
	MGH31	SAMD00893585		Myanmar (Mandalay)	human	urine	2023
	MGYG-HGUT-02512	LR699007		United Kingdom	human	gut	2019
	MM1680	CP149979		China	human	sputum	2017
	MM2467	CP149991		China	human	sputum	2022
	MM4205	CP149978		China	human	sputum	2016
	MM4512	CP149985		China	human	sputum	2019
	MM46903	CP070524		Czech	human	decubitus	2018
	MM48659	CP070537		Czech	human	urine	2019
	MM50821	CP070553		Czech	human	sputum	2019
	MM6005	CP149984		China	human	sputum	2017
	MM9291	CP149988		China	human	urine	2020
	MMAS2018	CP086203		China	animal (swine)	n.d.	2018
	MP63	CP048806		China	environment	wastewater	2018
	N18-00103	CP048275		Canada	human	sputum	2018
	NCTC12028	LS483498		United Kingdom	human	stool	2015
	NPT03	SAMD00893583		Myanmar (Naypyidaw)	human	urine	2024
	OT11	CP101057		China	Chinese edible frog (Hoplobatrachus rugulosus)	n.d.	2019
	RB02	CP150717		Taiwan	human	n.d.	1990
	RB04	CP150712		Taiwan	human	n.d.	1990
	RB05	CP150715		Taiwan	human	n.d.	1990
	RB11	CP150714		Taiwan	human	n.d.	1990
	S164-3	CP059477		China	subda pangolin (Manis javanica)	n.d.	2018
	Sample-M-2023	CP126137		China	oriental rat snake (Ptyas mucosa)	n.d.	2020
	SDTA-1	CP134699		China	cattle	n.d.	2018
	SMM01	CP063843		India	human	urine	2018
	YGH329	SAMD00893586		Myanmar (Yangon)	human	urine	2024
	YHG122	AP041090	NDM-1 MBL/ArmA producer	Myanmar (Yangon)	human	urine	2023
	All five isolates from Myanmar are highlighted in yellow.
