# Supplementary material for: Emergence of NDM-type metallo-β-lactamase and ArmA 16S rRNA methylase co-producing Morganella morganii in Myanmar
Source: Research Square preprint supplement (doi:10.21203/rs.3.rs-7405418/v1), 2025-10-12
Supplement: Supplementary file 3 [file fc89f3fb3cd40d968b52cbab.xlsx]

## Sheet: Sheet1
	Table1. Antimicrobiotic profiles and drug-resistant genes of the five isolates of Morganella morganii.
			MIC(µg/mL)																	aminoglycoside modifying enzymes encoding genes	16S rRNA methylase encoding gene	β-lactamase encoding genes	SXT resistance genes	chloramphenicol resistance genes	tetracycline resistance genes	mutations in QRDRsb and a quinolone resistance gene
			PENa	AMP	SAM	AZT	CAZ	FEP	CTX	IPM	MPM	AMK	ABK	GEN	CIP	LEV	CST	TGC	SXT
	isolates	hospitals		(32)b	(32/16)	(16)	(16)	(4)	(4)	(4)	(4)	(64)		(16)	(1)	(2)	(4)	(8)	(4/76)
	YGH122	A	>512	>512	512/256	32	128	>64	>512	16	1	>512	>512	>512	64	4	>512	2	>60/1140	aac(6')-Ib-cr,aac(3)-IIa, aadA5, aph(3')-Ia	armA	blaCTX-M-15, blaDHA-13, blaNDM-1, blaOXA-1	sul1, dfrA17	catA1	tet(B)	gyrA(D87K), parC(S80I)
	YGH329	A	>512	512	16/8	<0.25	<0.25	<0.25	<0.25	4	<0.25	8	4	2	4	4	> 512	2	>60/1140	aac(6')-Ib, aph(6)-Id, aph(3'')-Ib		blaDHA-5	sul1, sul2, dfrA1	floR	tet(M), tet(D)	gyrA(S83I, D87E), parC(S80I)
	NPT03	B	>512	>512	16/8	<0.25	<0.25	<0.25	<0.25	2	<0.25	2	2	32	2	1	>512	2	>60/1140	aac(3)-IV, aph(4)-Ia		blaDHA-21,blaTEM-1	sul1, sul2, dfrA15		tet(D)	gyrA(S83I, D87E), parC(S80I)
	MGH29	C	>512	>512	128/64	64	512	>64	512	8	<0.25	16	8	0.5	512	128	>512	8	>60/1140	ant(2'')-Ia, aph(3'')-Ib, aac(6')-Ib-cr, aac(2')-Ia, aadA2		blaVEB, blaCTX-M-15, blaDHA-18	sul1, sul2, dfrA1, dfrA19	catA3, catB3, cml	tet(B)	qnrD1, gyrA(S83I, D87E), parC(S80I)
	MGH31	C	>512	>512	64/32	4	2	16	16	4	<0.25	1	1	128	64	32	>512	2	0.029/0.55	aac(3)-IId, aadA2, ant(2'')-Ia		blaDHA-4, blaCTX-M-3, blaTEM-1, blaPSE-1	sul1	catA1	tet(B)	gyrA(S83R, D87E), parC(S80I)
	aPEN: penicillin, AMP: ampicillin, SAM: ampicillin/sulbactam, AZT aztreonam, CAZ: ceftazidime, FEP: cefepime, CTX: cefotaxime, IMP: imipenem, MPM: meropenem, AMK: amikacin, ABK: arbekacin, GEN: gentamicin, CIP: ciprofloxacin, LEV: levofloxacin, CST: colistin, TGC: tigecycline, SXT: trimethoprim/sulfamethoxazole
	bBreakpoints for microbial resistance were determined according to the guidelines of the Clinical and Laboratory Standards Institute for AMP, SAM, AZT, CAZ, FEP, CTX, IPM, MPM, AML, GEN, CIP, LEV, CST and SXT, and the U.S. Food and Drug Administration for TGC.
	cQRDRs: quinolone-resistant determining regions
